# Supplementary material
Source: PubMed Central journal article supplement (PMC9588800)
Supplement: NIHMS1838644-supplement-5.pdf [file NIHMS1838644-supplement-5.pdf]

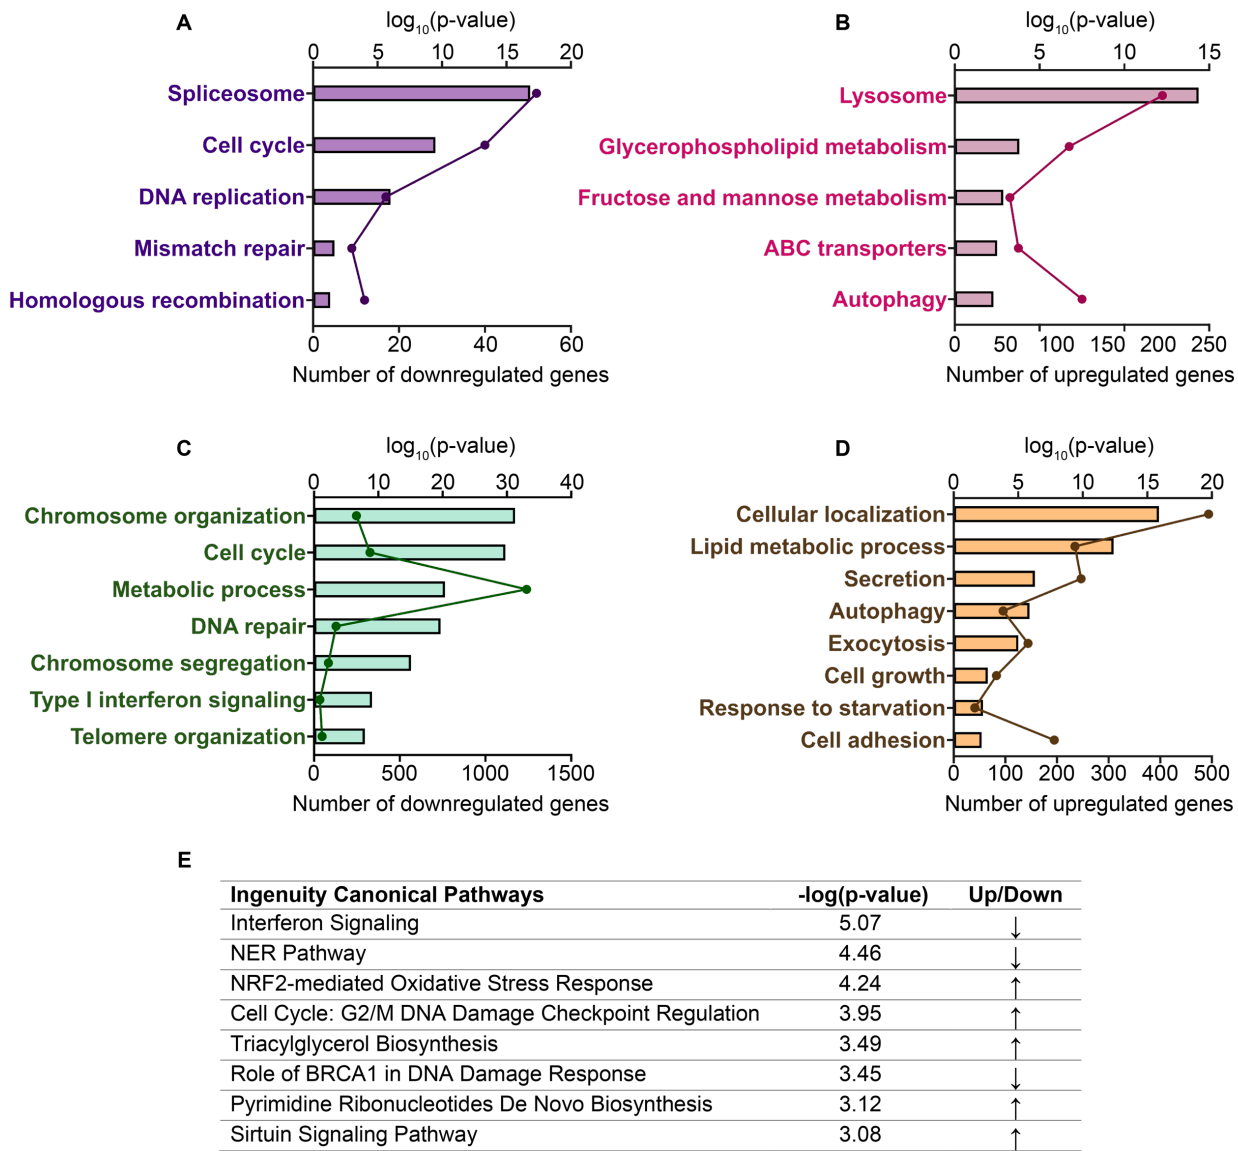

**Figure S1 NU-1 treatment alters signaling pathways in MCF7 cells, Related to Figure 1**

(A-D) GO term enrichment analysis of differentially expressed genes (DEGs) in NU-1 treated MCF7 cells using DAVID bioinformatics resource confirms enriched pathways identified with Reactome. **A** and **B**, enrichment of Kyoto Encyclopedia of Genes and Genomes (KEGG) pathways in downregulated (**A**) and upregulated (**B**) genes. **C** and **D**, enrichment of Biological Process (BG) GO annotations in downregulated (**C**) and upregulated (**D**) genes. Dots indicate the number of DEGs and bars indicate the  $-\log_{10}(p\text{-value})$  for each enriched pathway.

(E) Ingenuity canonical pathway analysis (IPA) of DEGs in NU-1 treated MCF7 cells.

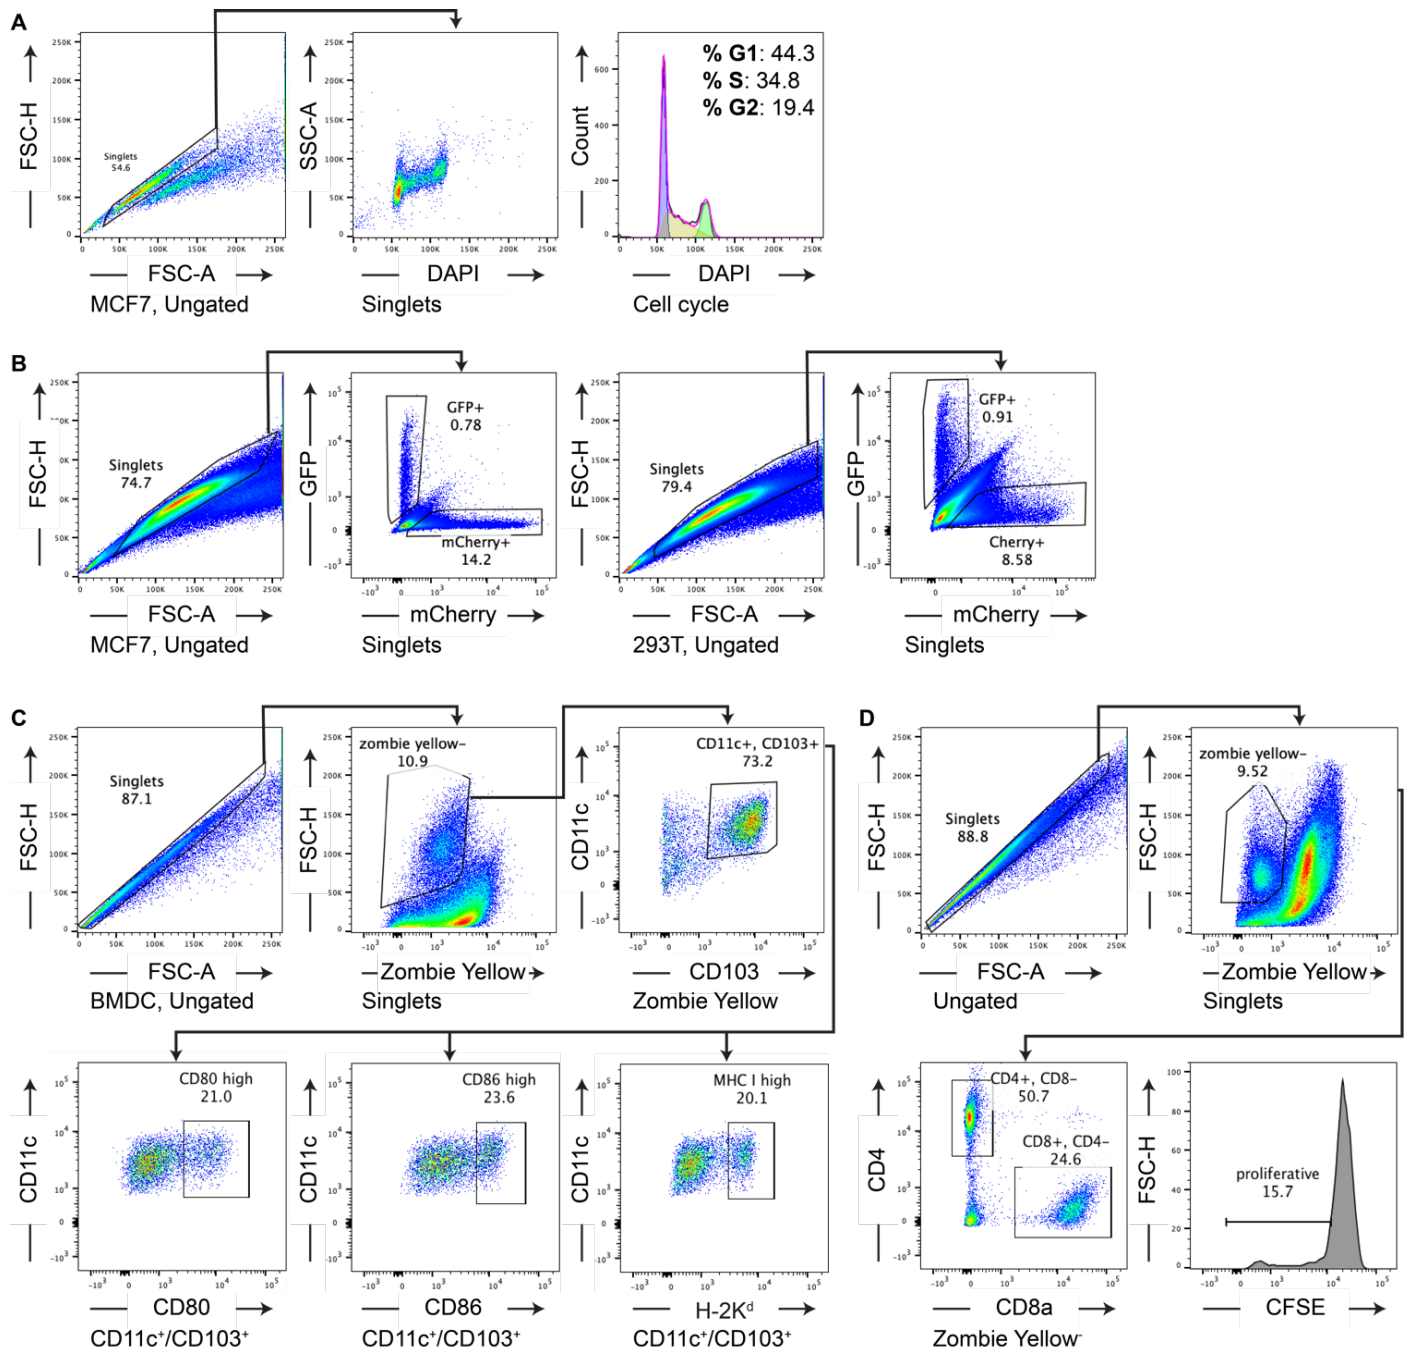

**Figure S2 Gating strategy for flow cytometric analysis, Related to STAR Methods**

**(A)** For cell cycle analysis, MCF7 single-cell population was selected based on forward and side scatter (FSC and SSC). The DNA content was analyzed by the intensity of DAPI staining.

**(A)** In Traffic Light Reporter assays, MCF7 (right) or 293T (left) cells were first gated for singularity and then analyzed for mCherry and GFP expression.

**(C)** In bone marrow-derived dendritic cells (BMDCs) activation assays, BMDCs were first gated for singularity. Then live cells were identified by size and Zombie yellow exclusion and gated on co-expression of CD11c and CD103 to identify DCs. The DC population was gated for expression of activation/maturation markers CD80, CD86, and H-2K<sup>d</sup>.

**(D)** In T cell priming assays, cells were first gated for singularity, size, and viability and gated into CD8<sup>+</sup> and CD4<sup>+</sup> T cell populations. CFSE dilution was measured in both CD8<sup>+</sup> and CD4<sup>+</sup> T cells.

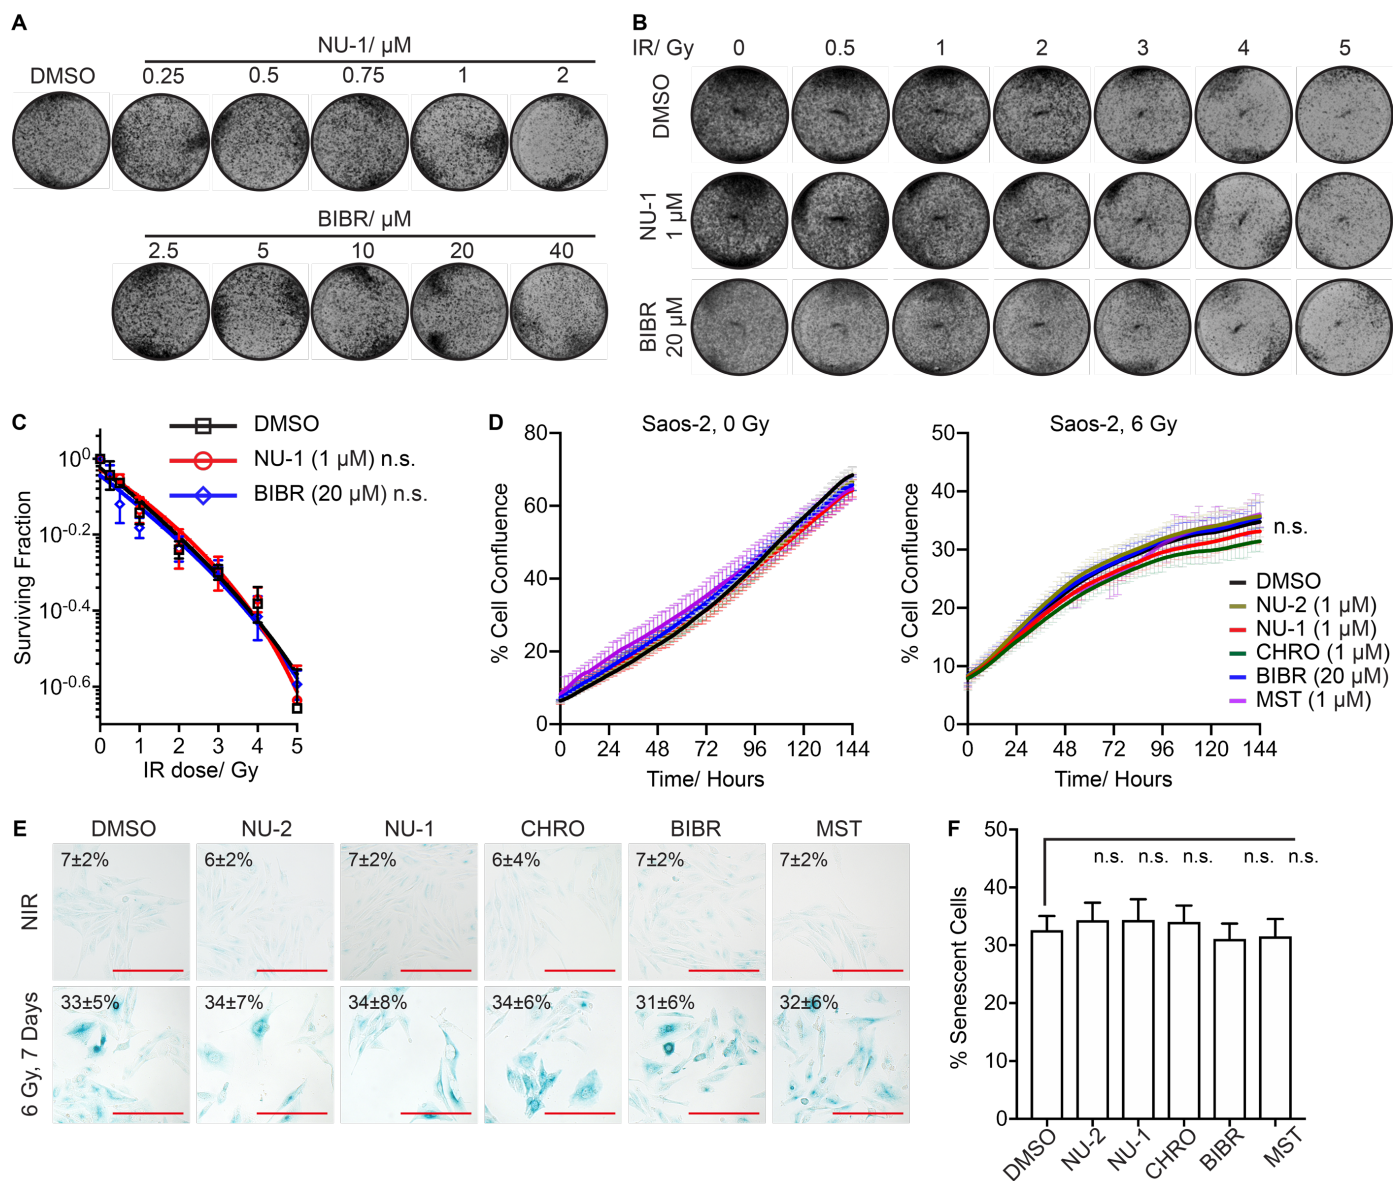

**Figure S3 TERT inhibition sensitizes telomerase positive cells to radiation, Related to STAR Methods and Table S3**

**(A)** Clonogenic survival of Saos-2 cells treated with DMSO, NU-1 or BIBR at indicated doses.

**(B)** Clonogenic survival of Saos-2 cells treated with IR ± TERT inhibitors. Saos-2 cells were treated with DMSO control, NU-1 (1  $\mu$ M), or BIBR (20  $\mu$ M) for 1 h, then irradiated at the indicated doses. Shown are representative images from three replicates.

**(C)** Quantitative analysis of **B**. Data from three replicates, mean  $\pm$  SD.

**(D)** Automated proliferation analysis from time-lapse imaging over 6 days comparing Saos-2 cells treated with DMSO, NU-2, NU-1, CHRO, BIBR or MST for 1 h, followed by 0 (NIR, left) or 6 Gy (right) at time 0. Results are shown as mean  $\pm$  SD. Images of 25 non-overlapping fields were captured for analysis of each sample.

**(E)** SA- $\beta$ -Gal staining of Saos-2 cells. Saos-2 cells were treated as in **D**, then fixed and stained after 7 days. Shown are representative images. % of SA- $\beta$ -Gal<sup>+</sup> cells are indicated. Scale bars=200  $\mu$ m.

**(F)** Quantification of SA- $\beta$ -Gal-positive Saos-2 cells after IR. Data from 5 non-overlapping images, mean  $\pm$  SD. n.s.  $P > 0.05$  compared to DMSO (unpaired t-test).

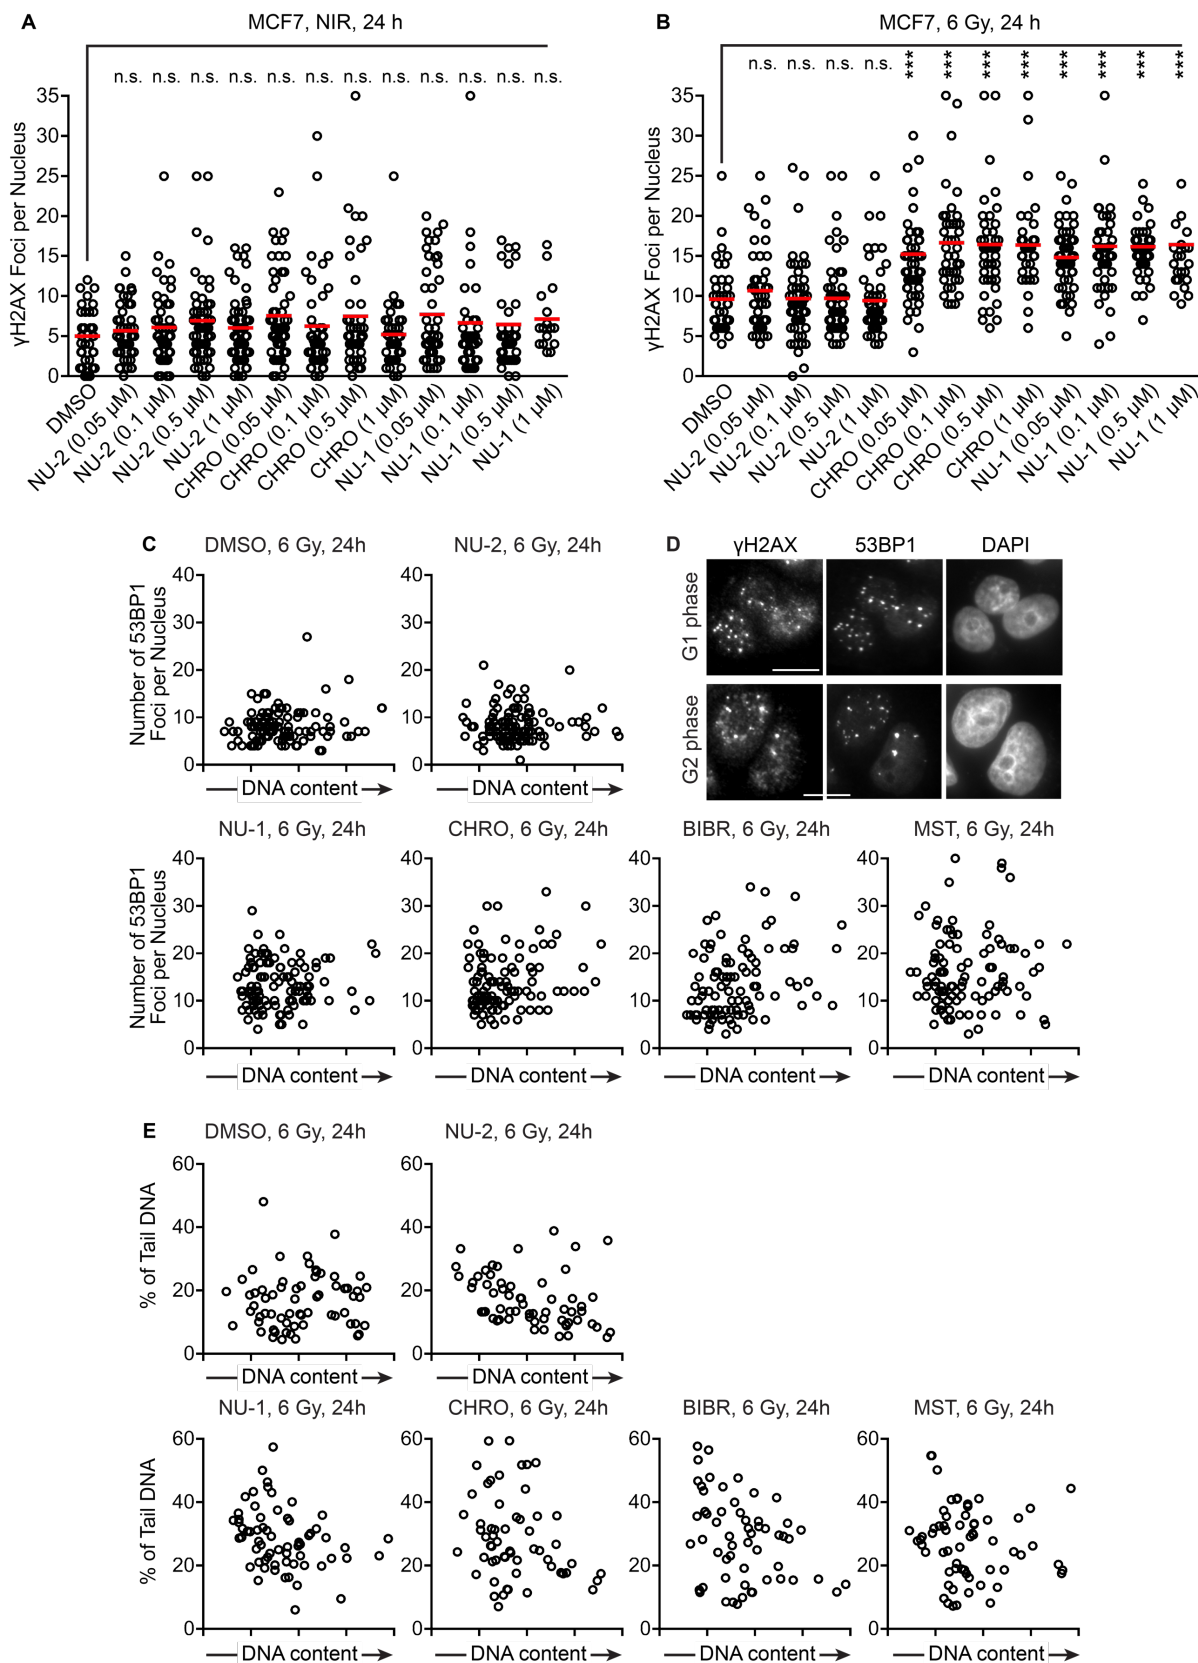

**Figure S4 TERT inhibition promotes DNA damage foci persistence in MCF7 cells, Related to Figure 4**

(A and B) Quantification of  $\gamma$ H2AX foci in MCF7 cells. Cells were treated with DMSO, CHRO, NU-1, or NU-2 at indicated doses for 1 h, followed by 0 (NIR, A) or 6 Gy (B), fixed after 24 h and stained for  $\gamma$ H2AX. >30 cells were analyzed for each condition. Shown are individual cells (open

circles) and mean (red bar). \*\*\*  $P < 0.001$ ; n.s.  $P > 0.05$  compared to DMSO (unpaired t-test).

**(C)** DNA damage foci staining assays with MCF7 cells were performed as in **Figure 4A** and **B**. The number of  $\gamma$ H2AX foci and DNA content based on DAPI intensity are plotted for individual cells (open circles).

**(D)** Representative images of MCF7 cells with G1 and G2 DNA content. MCF7 cells were treated with NU-1 (0.5  $\mu$ M) for 1 h, followed 6 Gy irradiation, then fixed and stained after 24 h. Scale bars, 20  $\mu$ m.

**(E)** Neutral comet assays with MCF7 cells were performed as in **Figure 4H**. The % tail DNA and total DNA content are plotted for individual nuclei (open circles).

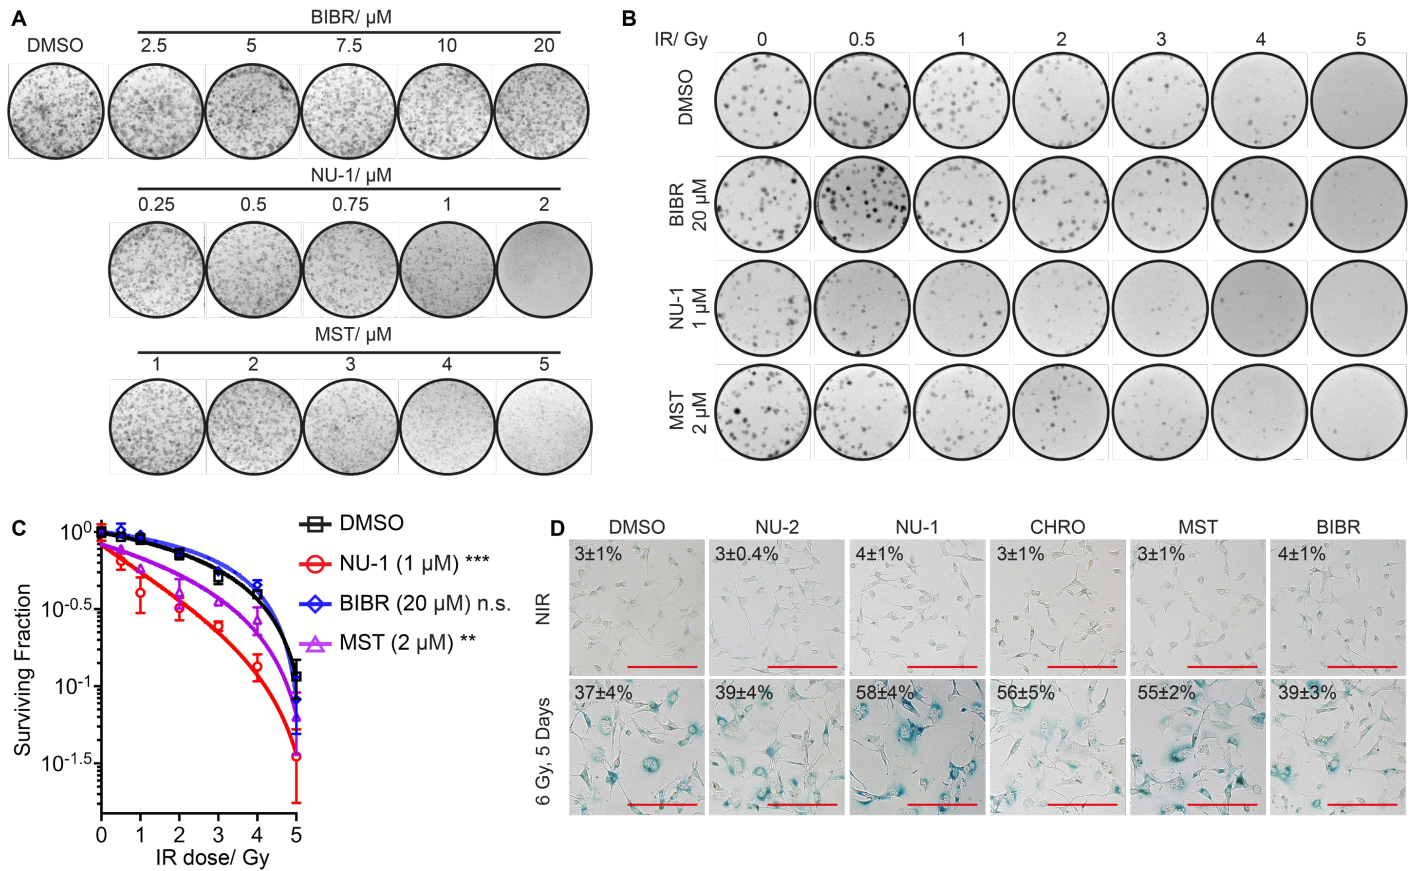

**Figure S5 TERT inhibition sensitizes telomerase positive cells to radiation, Related to STAR Methods and Table S3**

**(A)** Clonogenic assay of CT26 cells after telomerase inhibition. CT26 cells were treated with DMSO control, NU-1, BIBR, or MST at the indicated concentrations. Performed in triplicate. Representative images are shown.

**(B)** Clonogenic survival of CT26 cells after irradiation in the presence or absence of inhibitors. CT26 cells were treated with DMSO, BIBR (20  $\mu\text{M}$ ), NU-1 (1  $\mu\text{M}$ ), or MST (2  $\mu\text{M}$ ) for 1 h, followed by irradiation at the indicated doses. Performed in triplicate. Representative images are shown.

**(C)** Quantitative analysis of **B**. Normalized surviving fractions indicating the average of three replicates are shown, mean  $\pm$  SD. \*\*\*  $P < 0.001$ ; \*\*  $0.001 < P < 0.01$ ; n.s.  $P > 0.05$  compared to DMSO (unpaired t-test).

**(D)** SA- $\beta$ -Gal staining of CT26 cells. CT26 cells were treated with DMSO, NU-2, NU-1, CHRO, BIBR or MST for 1 h, followed by irradiation at 0 (NIR) or 10 Gy. Cells were fixed and stained 5 days after radiation. Representative 20X images are shown. Percentage of SA- $\beta$ -Gal<sup>+</sup> cells are indicated. Scale bars=200  $\mu\text{m}$ .

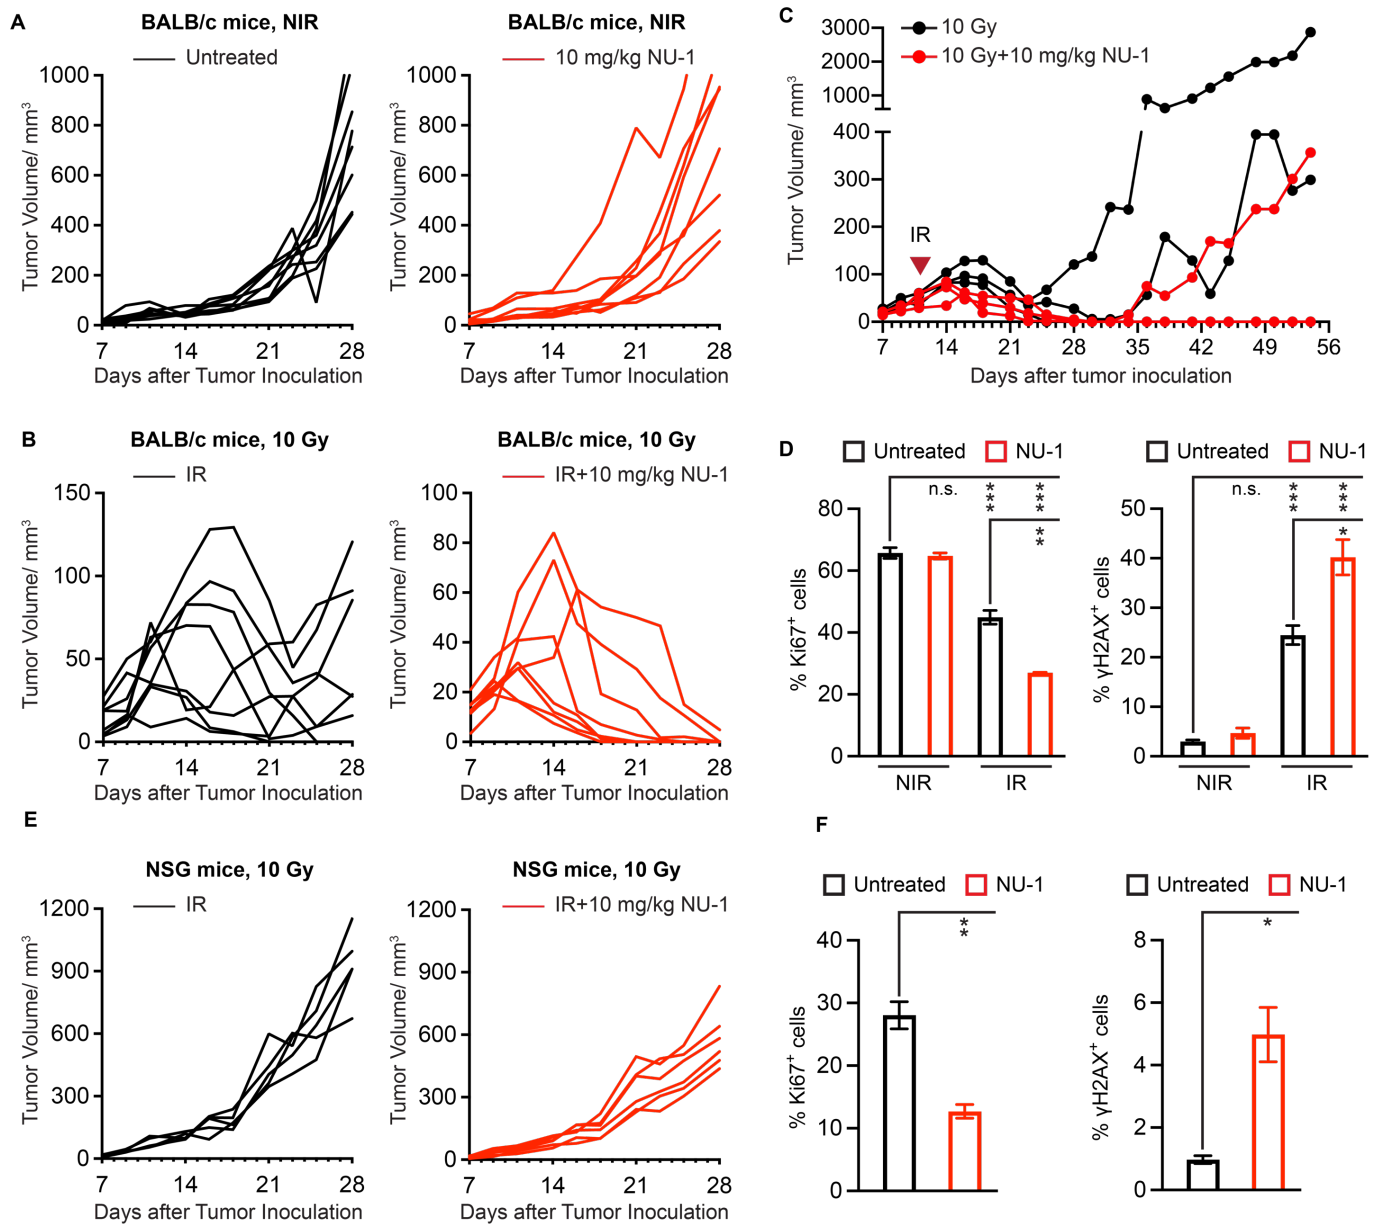

**Figure S6 TERT inhibition sensitizes CT26 tumors to radiation, Related to Figure 6**

(A-C) Growth curve of individual CT26 tumors in BALB/c mice. **A** and **B**, Tumor growth in individual BALB/c mice shown in **Figure 6B** and **6C**. **C**, Tumors were measured for 54 days after CT26 cell inoculation in BALB/c mice after radiation alone or combined with NU-1 (n = 3 for each).

(D) Bar graphs showing quantification of proliferating cells (Ki67<sup>+</sup>) and DNA damage (γH2AX<sup>+</sup>) in stained tumors shown in **Figure 6E**. Data from >3 non-overlapping images, mean ± SEM.

(E) Tumor growth in individual NSG mice as shown in **Figure 6H**.

(F) Bar graphs showing quantification of proliferating cells (Ki67<sup>+</sup>) and DNA damage (γH2AX<sup>+</sup>) in tumors stained as in **Figure 6J**. Data from >3 non-overlapping images, mean ± SEM. \*\*\* P < 0.001; \*\* 0.001 < P < 0.01; \* 0.01 < P < 0.05; n.s. P > 0.05 compared to DMSO (unpaired t-test).

**A** CFSE labeled CD8<sup>+</sup> T cells cocultured with DCs stimulated by:

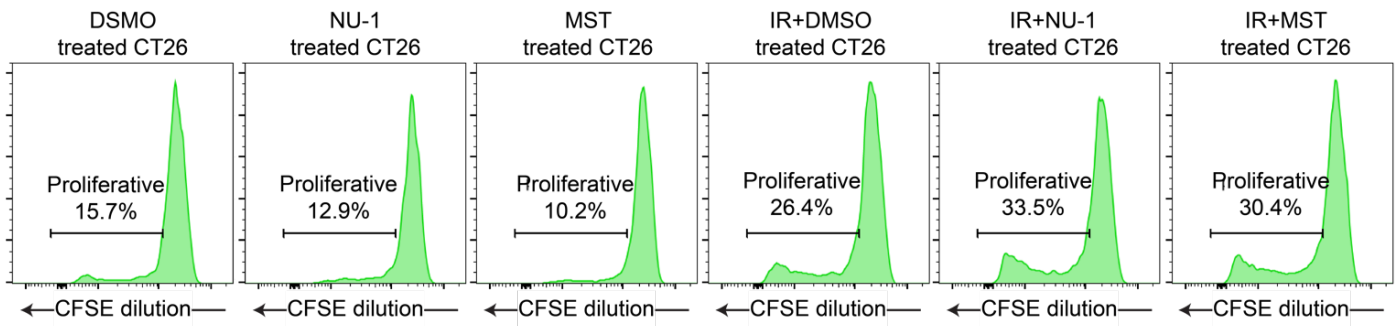

**B** CFSE labeled CD4<sup>+</sup> T cells cocultured with DCs stimulated by:

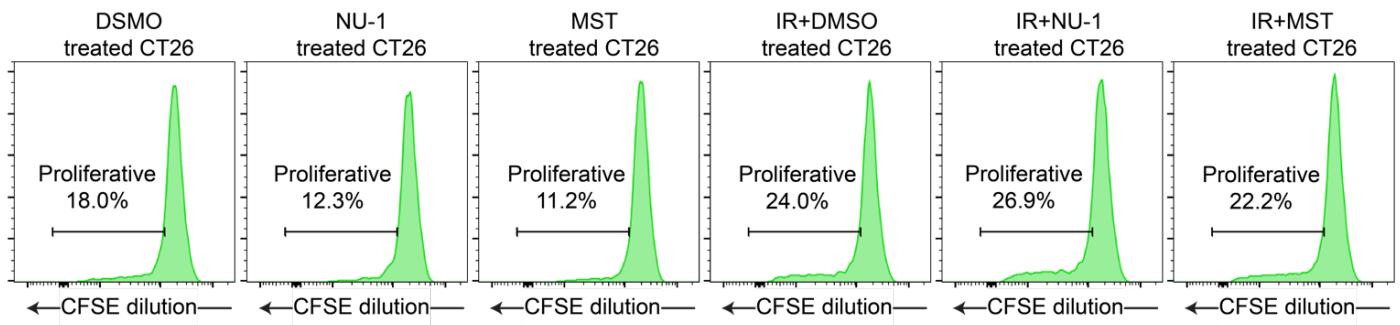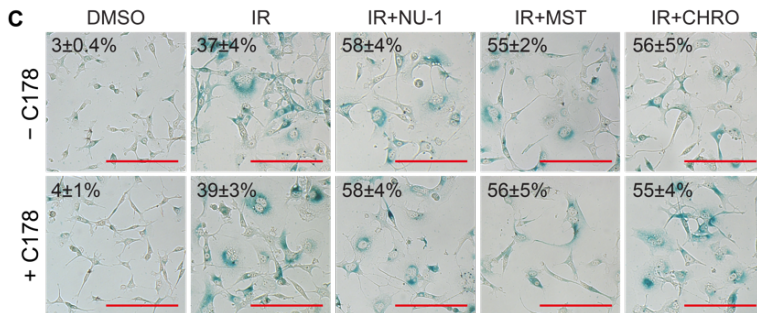

**Figure S7 Coculture with IR+TERT inhibitors treated CT26 cells enables dendritic cells to prime T cells, Related to Figure 7**

**(A and B)** Assays of DCs stimulated by CT26 cells for activation of CD8<sup>+</sup> **(C)** or CD4<sup>+</sup> **(D)** T cell proliferation. As indicated in **Figure 7C** and **D**, CFSE-labeled murine splenocytes were cocultured for 5 days with DCs pre-stimulated by CT26 cells treated with DMSO, NU-1, MST alone or combined with 10 Gy. Shown are histograms of Zombie yellow/CD8<sup>+</sup>/CD4<sup>-</sup> T cell population **(C)** and Zombie yellow/CD8<sup>-</sup>/CD4<sup>+</sup> T cell population **(D)**.

**(C)** SA-β-Gal staining of CT26 cells. CT26 cells were treated with IR (10 Gy), IR + NU-1 (1 μM), IR + MST (2 μM), IR + CHRO (1 μM), or DMSO control in the presence or absence of STING inhibitor C178 (4 μM). Cells were fixed and stained 5 days after irradiation. Representative 20X images are shown. Percentage of SA-β-Gal<sup>+</sup> cells are indicated (mean ± SD). Scale bars=200 μm.



**Table S1 Viability of cells treated with chemotherapy ± TERT inhibitors, Related to Figure 2**

|                             | Viability     | SD    | Viability     | SD    | Viability          | SD    | Viability          | SD    | Viability        | SD    |
|-----------------------------|---------------|-------|---------------|-------|--------------------|-------|--------------------|-------|------------------|-------|
| <b>MCF7 cells</b>           |               |       |               |       |                    |       |                    |       |                  |       |
| <b>log[Irinotecan], µM</b>  | <b>+ DMSO</b> |       | <b>+ NU-2</b> |       | <b>+ NU-1</b>      |       | <b>+ BIBR 1532</b> |       | <b>+ MST-312</b> |       |
| -3.000                      | 94.667        | 3.055 | 94.667        | 4.509 | 86.667             | 1.528 | 91.000             | 1.000 | 90.333           | 2.082 |
| -2.000                      | 84.333        | 2.517 | 85.000        | 4.583 | 78.333             | 1.528 | 83.667             | 2.887 | 82.667           | 1.528 |
| -1.000                      | 62.000        | 2.000 | 59.333        | 6.506 | 41.333             | 1.528 | 53.333             | 3.215 | 53.333           | 2.082 |
| 0.000                       | 37.000        | 2.000 | 36.000        | 6.000 | 15.000             | 3.606 | 27.333             | 5.033 | 27.333           | 2.517 |
| 1.000                       | 10.000        | 2.000 | 10.667        | 5.033 | 6.667              | 1.528 | 12.3333            | 5.132 | 10.000           | 2.000 |
| 2.000                       | 2.000         | 1.000 | 2.000         | 2.000 | 1.333              | 0.577 | 2.000              | 1.000 | 2.000            | 1.000 |
| <b>log[Etoposide], µM</b>   | <b>+ DMSO</b> |       | <b>+ NU-2</b> |       | <b>+ NU-1</b>      |       |                    |       |                  |       |
| -3.000                      | 94.667        | 3.055 | 97.000        | 2.000 | 94.000             | 2.000 |                    |       |                  |       |
| -2.000                      | 85.000        | 3.000 | 85.333        | 4.509 | 86.000             | 2.000 |                    |       |                  |       |
| -1.000                      | 75.333        | 4.509 | 71.333        | 6.110 | 36.000             | 4.583 |                    |       |                  |       |
| 0.000                       | 27.333        | 4.726 | 32.000        | 6.083 | 7.667              | 3.512 |                    |       |                  |       |
| 1.000                       | 10.000        | 2.000 | 10.667        | 5.033 | 6.667              | 1.528 |                    |       |                  |       |
| 2.000                       | 2.000         | 1.000 | 2.000         | 2.000 | 1.333              | 0.577 |                    |       |                  |       |
| <b>log[Doxorubicin], µM</b> | <b>+ DMSO</b> |       | <b>+ NU-2</b> |       | <b>+ NU-1</b>      |       |                    |       |                  |       |
| 0.000                       | 94.667        | 3.055 | 94.333        | 4.509 | 94.000             | 2.000 |                    |       |                  |       |
| 0.500                       | 93.000        | 2.646 | 92.667        | 5.033 | 86.667             | 5.508 |                    |       |                  |       |
| 1.000                       | 68.667        | 4.509 | 63.667        | 5.508 | 44.333             | 3.055 |                    |       |                  |       |
| 1.500                       | 9.333         | 2.887 | 8.333         | 3.786 | 2.000              | 1.000 |                    |       |                  |       |
| 2.000                       | 5.000         | 3.606 | 2.667         | 1.528 | 2.000              | 1.000 |                    |       |                  |       |
| 2.500                       | 2.000         | 1.000 | 2.000         | 2.000 | 1.333              | 0.577 |                    |       |                  |       |
| 3.000                       | 1.667         | 0.577 | 2.333         | 1.528 | 1.333              | 0.577 |                    |       |                  |       |
| <b>log[Paclitaxel], µM</b>  | <b>+ DMSO</b> |       | <b>+ NU-2</b> |       | <b>+ NU-1</b>      |       |                    |       |                  |       |
| 0.000                       | 94.667        | 3.055 | 94.333        | 4.509 | 94.000             | 2.000 |                    |       |                  |       |
| 0.400                       | 92.000        | 1.000 | 88.333        | 3.055 | 89.333             | 4.041 |                    |       |                  |       |
| 0.800                       | 80.000        | 4.000 | 78.000        | 3.000 | 51.667             | 4.509 |                    |       |                  |       |
| 1.200                       | 15.667        | 5.033 | 22.333        | 7.638 | 5.000              | 2.000 |                    |       |                  |       |
| 1.600                       | 2.333         | 1.528 | 4.333         | 4.163 | 2.000              | 1.000 |                    |       |                  |       |
| 2.000                       | 2.000         | 1.000 | 2.000         | 2.000 | 1.333              | 0.577 |                    |       |                  |       |
| 2.500                       | 1.667         | 0.577 | 2.333         | 1.528 | 1.333              | 0.577 |                    |       |                  |       |
| 3.000                       | 0.000         | 0.000 | 0.000         | 0.000 | 0.000              | 0.000 |                    |       |                  |       |
| <b>Co-administration</b>    |               |       |               |       |                    |       |                    |       |                  |       |
| <b>log[Irinotecan], µM</b>  | <b>+ DMSO</b> |       | <b>+ NU-1</b> |       | <b>+ BIBR 1532</b> |       | <b>+ MST-312</b>   |       |                  |       |
| -3.000                      | 94.667        | 3.055 | 98.000        | 2.000 | 97.000             | 1.000 | 98.667             | 1.528 |                  |       |
| -2.000                      | 93.000        | 1.000 | 93.667        | 1.155 | 94.333             | 1.528 | 93.667             | 2.082 |                  |       |
| -1.000                      | 84.667        | 2.517 | 77.667        | 2.517 | 78.333             | 0.577 | 78.000             | 3.606 |                  |       |
| 0.000                       | 29.000        | 4.000 | 24.333        | 2.309 | 27.333             | 3.786 | 26.333             | 3.215 |                  |       |
| 1.000                       | 5.000         | 3.606 | 8.667         | 1.528 | 8.333              | 0.577 | 4.000              | 1.732 |                  |       |
| 2.000                       | 2.000         | 1.000 | 1.000         | 1.000 | 2.000              | 0.000 | 1.667              | 0.577 |                  |       |
| <b>Post-administration</b>  |               |       |               |       |                    |       |                    |       |                  |       |
| <b>log[Irinotecan], µM</b>  | <b>+ DMSO</b> |       | <b>+ NU-1</b> |       | <b>+ BIBR 1532</b> |       | <b>+ MST-312</b>   |       |                  |       |
| -3.000                      | 94.667        | 3.055 | 97.667        | 2.082 | 97.333             | 1.155 | 97.667             | 1.155 |                  |       |
| -2.000                      | 84.333        | 2.517 | 92.333        | 0.577 | 95.333             | 1.155 | 93.667             | 0.577 |                  |       |
| -1.000                      | 77.000        | 4.583 | 71.667        | 2.082 | 72.000             | 2.000 | 71.000             | 1.732 |                  |       |
| 0.000                       | 23.333        | 5.132 | 20.333        | 2.517 | 23.333             | 1.155 | 20.667             | 2.082 |                  |       |
| 1.000                       | 7.000         | 3.606 | 6.667         | 0.577 | 6.667              | 3.512 | 9.000              | 1.000 |                  |       |
| 2.000                       | 2.000         | 1.000 | 1.000         | 1.000 | 1.000              | 1.000 | 0.000              | 0.000 |                  |       |
| <b>Saos-2 cells</b>         |               |       |               |       |                    |       |                    |       |                  |       |
| <b>log[Irinotecan], µM</b>  | <b>+ DMSO</b> |       | <b>+ NU-2</b> |       | <b>+ NU-1</b>      |       | <b>+ BIBR 1532</b> |       | <b>+ MST-312</b> |       |
| -3.000                      | 93.667        | 1.528 | 93.000        | 2.646 | 92.333             | 2.082 | 92.667             | 2.082 | 90.333           | 2.082 |
| -2.000                      | 84.333        | 2.517 | 82.000        | 6.245 | 83.000             | 2.000 | 85.333             | 2.887 | 82.667           | 1.528 |
| -1.000                      | 63.000        | 3.606 | 65.333        | 5.033 | 59.000             | 2.000 | 61.000             | 8.660 | 65.333           | 4.041 |
| 0.000                       | 36.667        | 4.509 | 35.667        | 7.638 | 34.333             | 4.163 | 36.333             | 2.082 | 37.000           | 2.000 |
| 1.000                       | 8.667         | 2.082 | 10.333        | 5.508 | 9.333              | 3.215 | 10.667             | 4.041 | 12.667           | 2.082 |
| 2.000                       | 2.000         | 1.000 | 2.000         | 1.000 | 3.333              | 1.155 | 2.000              | 1.000 | 2.000            | 1.000 |

| <b>log[Etoposide], <math>\mu\text{M}</math></b>   | <b>+ DMSO</b> |       | <b>+ NU-2</b> |       | <b>+ NU-1</b> |       |  |  |  |  |
|---------------------------------------------------|---------------|-------|---------------|-------|---------------|-------|--|--|--|--|
| -3.000                                            | 94.667        | 3.055 | 97.000        | 2.000 | 94.000        | 2.000 |  |  |  |  |
| -2.000                                            | 87.667        | 4.933 | 91.000        | 3.606 | 87.667        | 4.933 |  |  |  |  |
| -1.000                                            | 81.000        | 6.557 | 76.333        | 5.508 | 75.000        | 5.568 |  |  |  |  |
| 0.000                                             | 12.667        | 3.055 | 16.667        | 6.110 | 15.667        | 5.033 |  |  |  |  |
| 1.000                                             | 5.000         | 2.646 | 4.333         | 1.528 | 2.333         | 1.528 |  |  |  |  |
| 2.000                                             | 2.000         | 1.000 | 2.000         | 2.000 | 1.333         | 0.577 |  |  |  |  |
| <b>log[Doxorubicin], <math>\mu\text{M}</math></b> | <b>+ DMSO</b> |       | <b>+ NU-2</b> |       | <b>+ NU-1</b> |       |  |  |  |  |
| 0.000                                             | 102.000       | 2.000 | 96.333        | 2.517 | 100.333       | 1.528 |  |  |  |  |
| 0.500                                             | 93.667        | 3.786 | 92.667        | 5.033 | 92.000        | 2.000 |  |  |  |  |
| 1.000                                             | 50.333        | 3.512 | 51.000        | 7.550 | 46.333        | 7.095 |  |  |  |  |
| 1.500                                             | 2.333         | 1.528 | 0.000         | 0.000 | 0.000         | 0.000 |  |  |  |  |
| 2.000                                             | 2.000         | 1.000 | 0.000         | 0.000 | 0.000         | 0.000 |  |  |  |  |
| 2.500                                             | 0.000         | 0.000 | 0.000         | 0.000 | 0.000         | 0.000 |  |  |  |  |
| 3.000                                             | 0.000         | 0.000 | 0.000         | 0.000 | 0.000         | 0.000 |  |  |  |  |
| <b>log[Paclitaxel], <math>\mu\text{M}</math></b>  | <b>+ DMSO</b> |       | <b>+ NU-2</b> |       | <b>+ NU-1</b> |       |  |  |  |  |
| 0.000                                             | 94.667        | 3.055 | 94.333        | 4.509 | 93.000        | 2.000 |  |  |  |  |
| 0.400                                             | 90.333        | 2.517 | 87.667        | 6.506 | 92.000        | 2.000 |  |  |  |  |
| 0.800                                             | 68.333        | 3.055 | 61.333        | 3.215 | 55.667        | 3.215 |  |  |  |  |
| 1.200                                             | 12.333        | 2.517 | 10.333        | 6.110 | 6.000         | 4.583 |  |  |  |  |
| 1.600                                             | 2.333         | 1.528 | 4.333         | 4.163 | 2.000         | 1.000 |  |  |  |  |
| 2.000                                             | 2.000         | 1.000 | 2.000         | 2.000 | 1.333         | 0.577 |  |  |  |  |
| 2.500                                             | 1.667         | 0.577 | 2.333         | 1.528 | 1.333         | 0.577 |  |  |  |  |
| 3.000                                             | 0.000         | 0.000 | 0.000         | 0.000 | 0.000         | 0.000 |  |  |  |  |
| <b>A549 cells</b>                                 |               |       |               |       |               |       |  |  |  |  |
| <b>log[Irinotecan], <math>\mu\text{M}</math></b>  | <b>+ DMSO</b> |       | <b>+ NU-2</b> |       | <b>+ NU-1</b> |       |  |  |  |  |
| -3.000                                            | 96.000        | 2.000 | 94.333        | 2.517 | 94.000        | 2.000 |  |  |  |  |
| -2.000                                            | 88.000        | 3.000 | 88.667        | 3.215 | 88.333        | 3.055 |  |  |  |  |
| -1.000                                            | 79.667        | 5.033 | 72.000        | 2.646 | 46.000        | 3.606 |  |  |  |  |
| 0.000                                             | 35.333        | 4.509 | 31.667        | 8.622 | 15.333        | 3.512 |  |  |  |  |
| 1.000                                             | 13.667        | 3.215 | 8.000         | 4.583 | 4.667         | 3.055 |  |  |  |  |
| 2.000                                             | 2.000         | 1.000 | 2.000         | 2.000 | 1.333         | 0.577 |  |  |  |  |
| <b>log[Etoposide], <math>\mu\text{M}</math></b>   | <b>+ DMSO</b> |       | <b>+ NU-2</b> |       | <b>+ NU-1</b> |       |  |  |  |  |
| -3.000                                            | 94.667        | 3.055 | 97.000        | 2.000 | 94.000        | 2.000 |  |  |  |  |
| -2.000                                            | 84.000        | 4.583 | 90.333        | 2.082 | 86.333        | 5.686 |  |  |  |  |
| -1.000                                            | 83.667        | 1.528 | 81.667        | 6.506 | 52.333        | 5.508 |  |  |  |  |
| 0.000                                             | 15.333        | 6.110 | 15.667        | 8.622 | 5.000         | 3.606 |  |  |  |  |
| 1.000                                             | 3.000         | 1.732 | 3.667         | 2.517 | 2.000         | 1.000 |  |  |  |  |
| 2.000                                             | 2.000         | 1.000 | 2.000         | 2.000 | 1.333         | 0.577 |  |  |  |  |
| <b>log[Doxorubicin], <math>\mu\text{M}</math></b> | <b>+ DMSO</b> |       | <b>+ NU-2</b> |       | <b>+ NU-1</b> |       |  |  |  |  |
| 0.000                                             | 100.667       | 2.082 | 97.667        | 3.215 | 99.333        | 3.512 |  |  |  |  |
| 0.500                                             | 97.667        | 4.509 | 96.667        | 4.933 | 88.667        | 4.163 |  |  |  |  |
| 1.000                                             | 79.333        | 3.512 | 72.000        | 3.000 | 50.667        | 5.033 |  |  |  |  |
| 1.500                                             | 16.667        | 5.508 | 16.000        | 7.000 | 0.000         | 0.000 |  |  |  |  |
| 2.000                                             | 1.000         | 1.732 | 2.667         | 1.528 | 0.000         | 0.000 |  |  |  |  |
| 2.500                                             | 0.000         | 0.000 | 2.000         | 2.000 | 0.000         | 0.000 |  |  |  |  |
| 3.000                                             | 0.000         | 0.000 | 2.333         | 1.528 | 0.000         | 0.000 |  |  |  |  |
| <b>log[Paclitaxel], <math>\mu\text{M}</math></b>  | <b>+ DMSO</b> |       | <b>+ NU-2</b> |       | <b>+ NU-1</b> |       |  |  |  |  |
| 0.000                                             | 94.667        | 3.055 | 102.333       | 2.082 | 102.333       | 3.055 |  |  |  |  |
| 0.400                                             | 88.000        | 7.000 | 99.667        | 2.082 | 92.000        | 4.000 |  |  |  |  |
| 0.800                                             | 87.333        | 3.512 | 81.333        | 2.517 | 87.333        | 4.041 |  |  |  |  |
| 1.200                                             | 43.000        | 5.292 | 37.000        | 7.000 | 21.667        | 3.055 |  |  |  |  |
| 1.600                                             | 7.333         | 4.041 | 10.667        | 6.506 | 2.000         | 1.000 |  |  |  |  |
| 2.000                                             | 1.000         | 0.000 | 0.000         | 0.000 | 0.000         | 0.000 |  |  |  |  |
| 2.500                                             | 1.333         | 0.577 | 0.000         | 0.000 | 0.000         | 0.000 |  |  |  |  |
| 3.000                                             | 0.333         | 0.577 | 0.000         | 0.000 | 0.000         | 0.000 |  |  |  |  |

**Table S2 Lethal dose 50 (LD<sub>50</sub>) in cells, Related to Figure 2**

|                                                                | MCF7             |       |         | Saos-2           |       |         | A549             |       |         |
|----------------------------------------------------------------|------------------|-------|---------|------------------|-------|---------|------------------|-------|---------|
|                                                                | LD <sub>50</sub> | SEM   | P value | LD <sub>50</sub> | SEM   | P value | LD <sub>50</sub> | SEM   | P value |
| <b>Irinotecan (µM)</b>                                         |                  |       |         |                  |       |         |                  |       |         |
| + DMSO                                                         | 0.366            | 0.063 |         | 0.399            | 0.075 |         | 0.552            | 0.089 |         |
| + NU-2                                                         | 0.292            | 0.100 | 0.565   | 0.443            | 0.129 | 0.783   | 0.414            | 0.068 | 0.285   |
| + NU-1                                                         | 0.080            | 0.009 | 0.011   | 0.281            | 0.053 | 0.268   | 0.090            | 0.011 | 0.007   |
| + BIBR 1532                                                    | 0.158            | 0.038 | 0.048   | 0.366            | 0.099 | 0.804   | N/A              |       |         |
| + MST-312                                                      | 0.168            | 0.025 | 0.043   | 0.537            | 0.071 | 0.252   | N/A              |       |         |
| <b>Etoposide (µM)</b>                                          |                  |       |         |                  |       |         |                  |       |         |
| + DMSO                                                         | 0.393            | 0.059 |         | 0.306            | 0.043 |         | 0.398            | 0.065 |         |
| + NU-2                                                         | 0.389            | 0.085 | 0.971   | 0.279            | 0.032 | 0.641   | 0.323            | 0.046 | 0.400   |
| + NU-1                                                         | 0.061            | 0.006 | 0.005   | 0.296            | 0.035 | 0.866   | 0.119            | 0.011 | 0.013   |
| <b>Doxorubicin (µM)</b>                                        |                  |       |         |                  |       |         |                  |       |         |
| + DMSO                                                         | 13.650           | 0.512 |         | 9.905            | 0.263 |         | 16.900           | 0.637 |         |
| + NU-2                                                         | 12.710           | 0.538 | 0.274   | 10.400           | 0.270 | 0.259   | 15.060           | 0.697 | 0.123   |
| + NU-1                                                         | 9.525            | 0.291 | 0.002   | 9.529            | 0.303 | 0.402   | 10.310           | 0.372 | 0.001   |
| <b>Paclitaxel (µM)</b>                                         |                  |       |         |                  |       |         |                  |       |         |
| + DMSO                                                         | 10.070           | 0.831 |         | 8.542            | 0.569 |         | 15.140           | 1.713 |         |
| + NU-2                                                         | 10.760           | 1.431 | 0.698   | 7.728            | 0.959 | 0.506   | 12.010           | 1.563 | 0.248   |
| + NU-1                                                         | 6.661            | 0.382 | 0.020   | 6.985            | 0.972 | 0.239   | 11.220           | 1.254 | 0.139   |
| <b>Irinotecan (µM) (co-administered with TERT inhibitor)</b>   |                  |       |         |                  |       |         |                  |       |         |
| + DMSO                                                         | 0.426            | 0.037 |         |                  |       |         |                  |       |         |
| + NU-1                                                         | 0.332            | 0.027 | 0.122   |                  |       |         |                  |       |         |
| + BIBR 1532                                                    | 0.371            | 0.024 | 0.447   |                  |       |         |                  |       |         |
| + MST-312                                                      | 0.368            | 0.027 | 0.409   |                  |       |         |                  |       |         |
| <b>Irinotecan (µM) (post-administered with TERT inhibitor)</b> |                  |       |         |                  |       |         |                  |       |         |
| + DMSO                                                         | 0.303            | 0.055 |         |                  |       |         |                  |       |         |
| + NU-1                                                         | 0.257            | 0.017 | 0.629   |                  |       |         |                  |       |         |
| + BIBR 1532                                                    | 0.276            | 0.018 | 0.878   |                  |       |         |                  |       |         |
| + MST-312                                                      | 0.248            | 0.020 | 0.508   |                  |       |         |                  |       |         |

**Table S3 Surviving fraction at 2 Gy (SF<sub>2</sub>), Related to Figure 3, S3, and S6**

| <b>MCF7 cells</b> |                      |       |                                      |
|-------------------|----------------------|-------|--------------------------------------|
| Treatment         | Mean SF <sub>2</sub> | SD    | P value (compared to DMSO treatment) |
| DMSO              | 0.369                | 0.038 | N/A                                  |
| NU-1              | 0.116                | 0.045 | 0.0018                               |
| BIBR 1532         | 0.256                | 0.030 | 0.0153                               |
| MST-312           | 0.245                | 0.035 | 0.0138                               |

  

| <b>Saos-2 cells</b> |                      |       |                                      |
|---------------------|----------------------|-------|--------------------------------------|
| Treatment           | Mean SF <sub>2</sub> | SD    | P value (compared to DMSO treatment) |
| DMSO                | 0.576                | 0.024 | N/A                                  |
| NU-1                | 0.583                | 0.057 | 0.4419                               |
| BIBR 1532           | 0.580                | 0.036 | 0.4495                               |

  

| <b>CT26 cells</b> |                      |       |                                      |
|-------------------|----------------------|-------|--------------------------------------|
| Treatment         | Mean SF <sub>2</sub> | SD    | P value (compared to DMSO treatment) |
| DMSO              | 0.721                | 0.045 | N/A                                  |
| NU-1              | 0.322                | 0.044 | 0.0004                               |
| BIBR 1532         | 0.727                | 0.020 | 0.4392                               |
| MST-312           | 0.407                | 0.071 | 0.0032                               |
